# Supplementary material for: Sub 500 nm refractory carbonaceous particles in the polar stratosphere
Source: Copernicus journal article supplement (doi:10.5194/acp-2017-278), 2017-04-03
Supplement: Supplementary file 1 [file acp-2017-278-supplement.pdf]

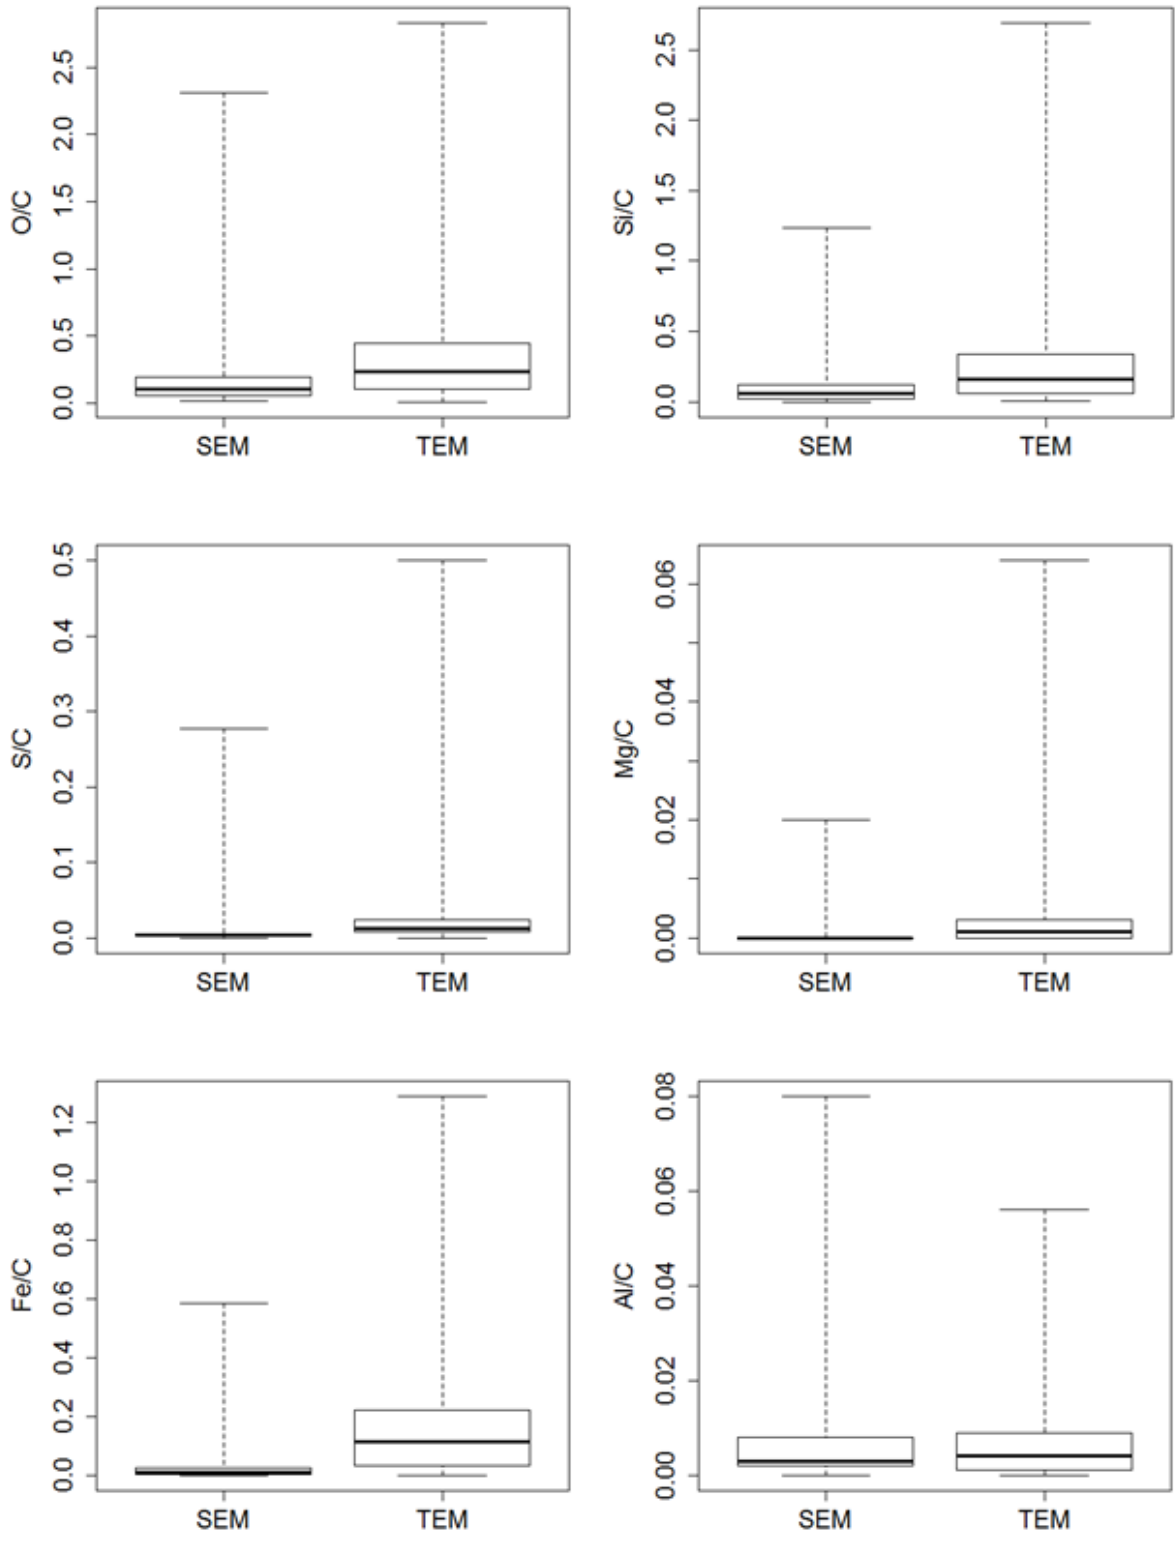

Figure S1: Boxplots of element ratios (intensity ratio) determined by EDX in SEM and TEM. Lower and upper quartiles appear as a box, minimum and maximum values as whiskers.
